# Supplementary material for: Cudarflavone B Provides Neuroprotection against Glutamate-Induced Mouse Hippocampal HT22 Cell Damage through the Nrf2 and PI3K/Akt Signaling Pathways
Source: PubMed Central journal article supplement (PMC6271666; doi:10.3390/molecules190810818), 2014-07-24

# Supplementary Information

## Table of Contents

- Figure S1.  $^1\text{H}$ -NMR spectrum of cudarflavone B
- Figure S2.  $^{13}\text{C}$ -NMR spectrum of cudarflavone B
- Figure S3. HSQC data of cudarflavone B
- Figure S4. COSY data of cudarflavone B
- Figure S5. HMBC data of cudarflavone B

Figure S1.  $^1\text{H}$ -NMR spectrum of cudarflavone B.

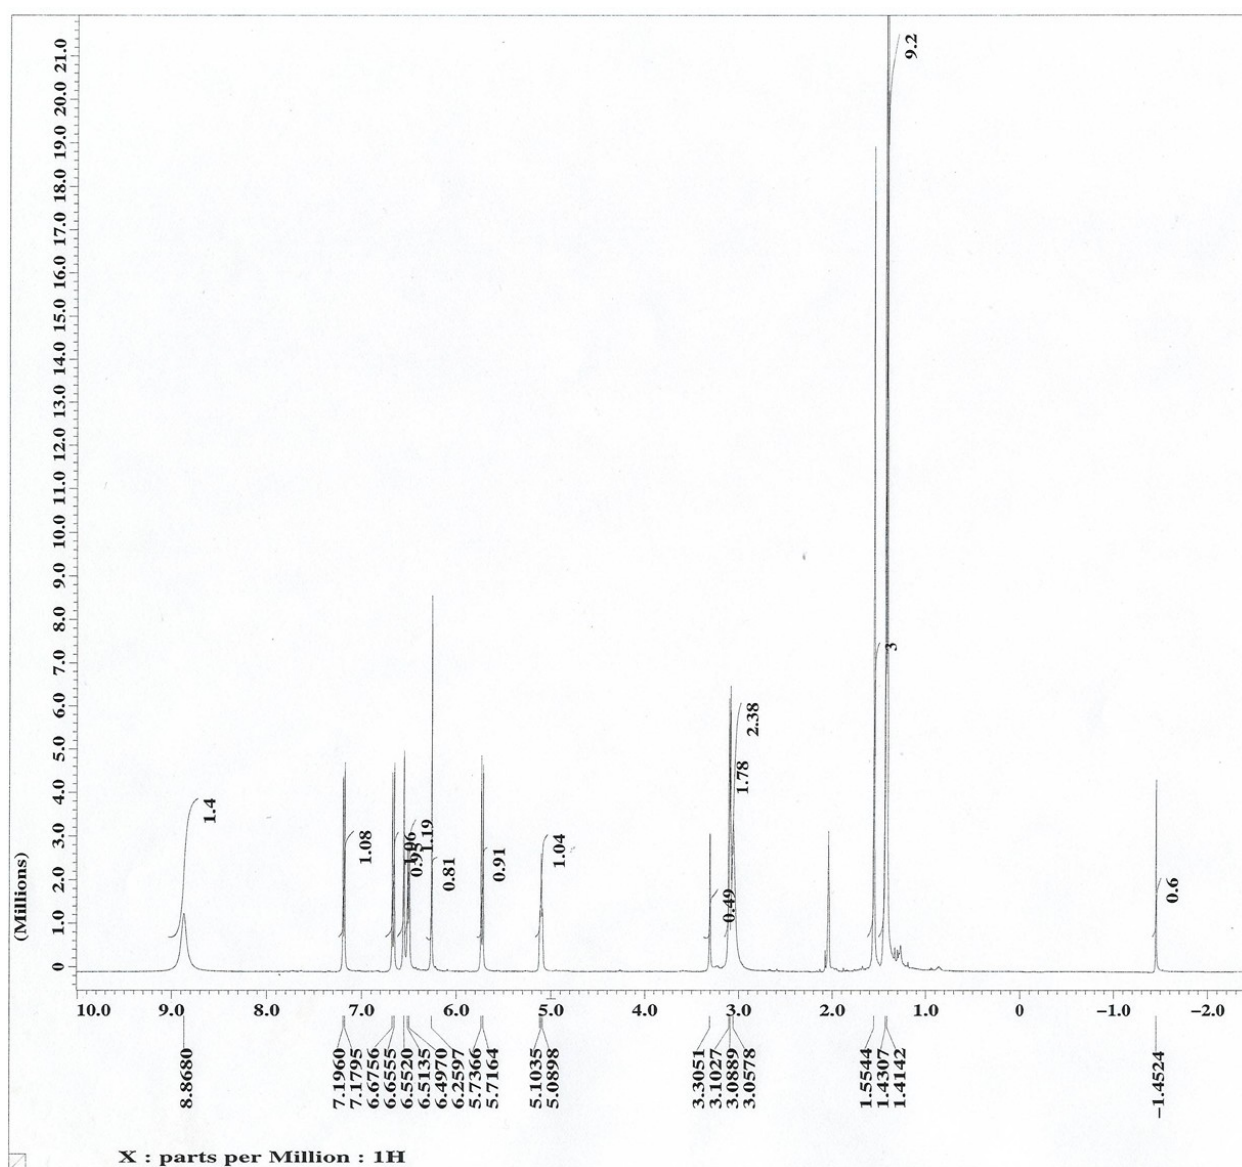

**Figure S2.**  $^{13}\text{C}$ -NMR spectrum of cudarflavone B.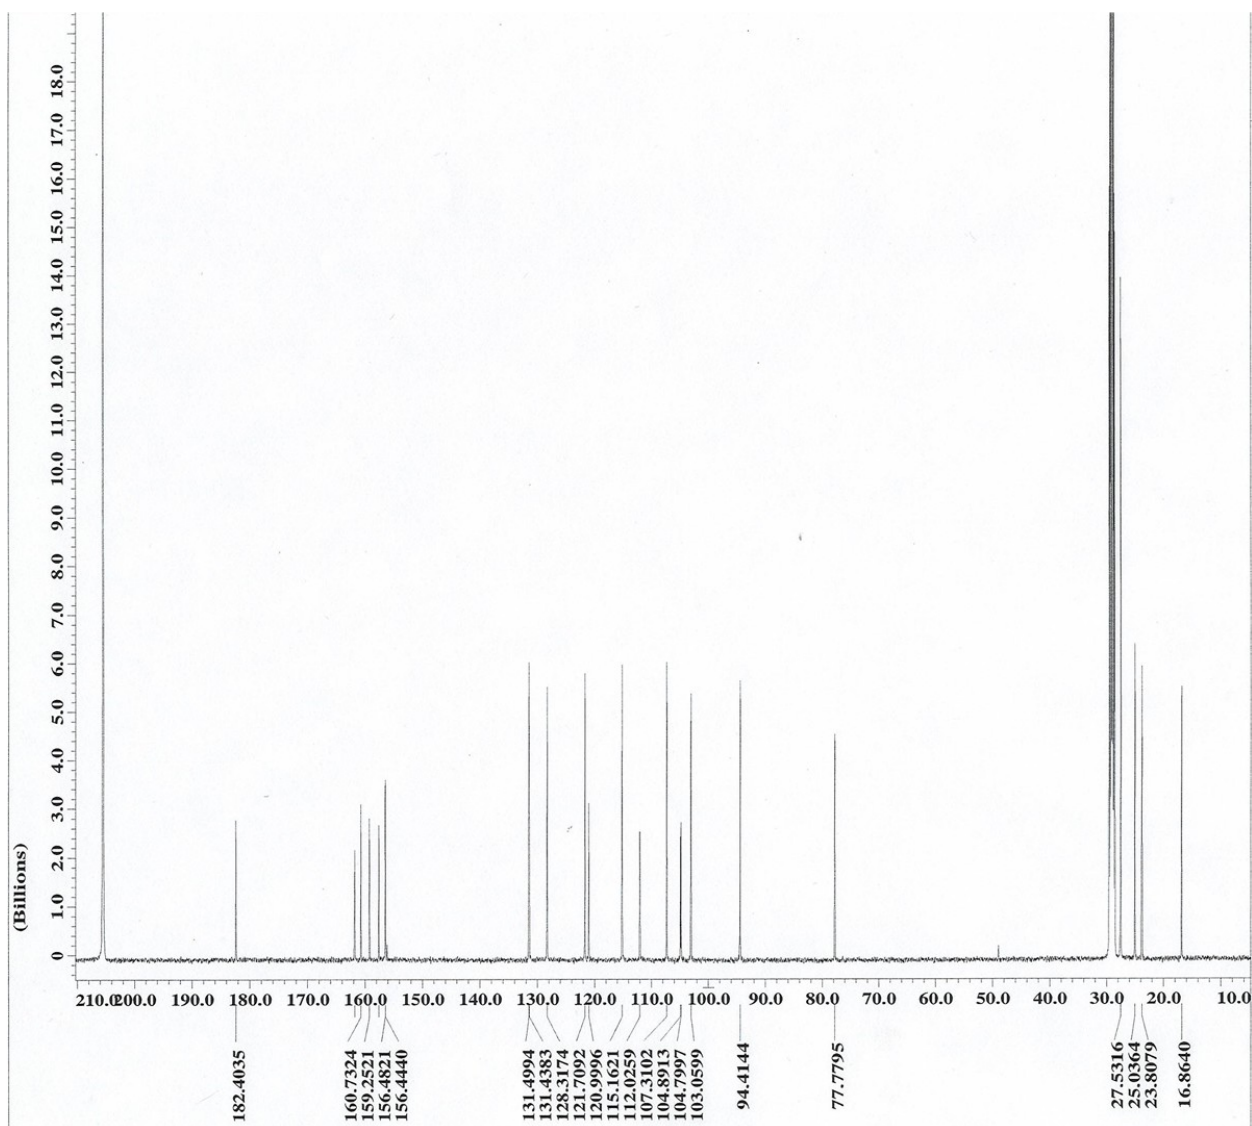

Figure S3. HSQC data of cudarflavone B.

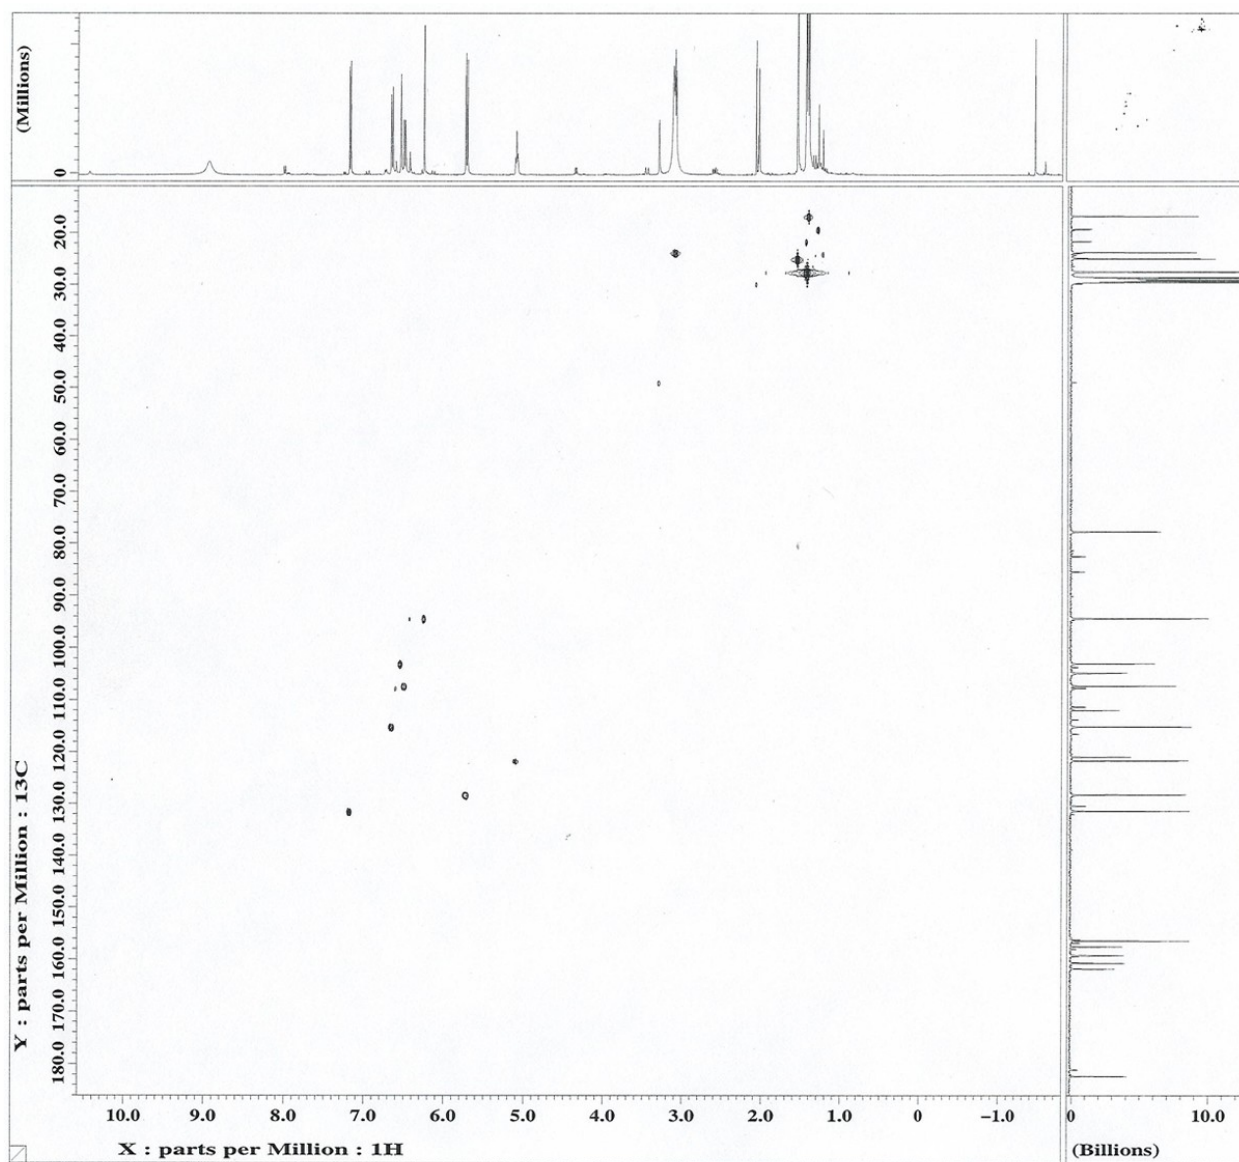

Figure S4. COSY data of cudarflavone B.

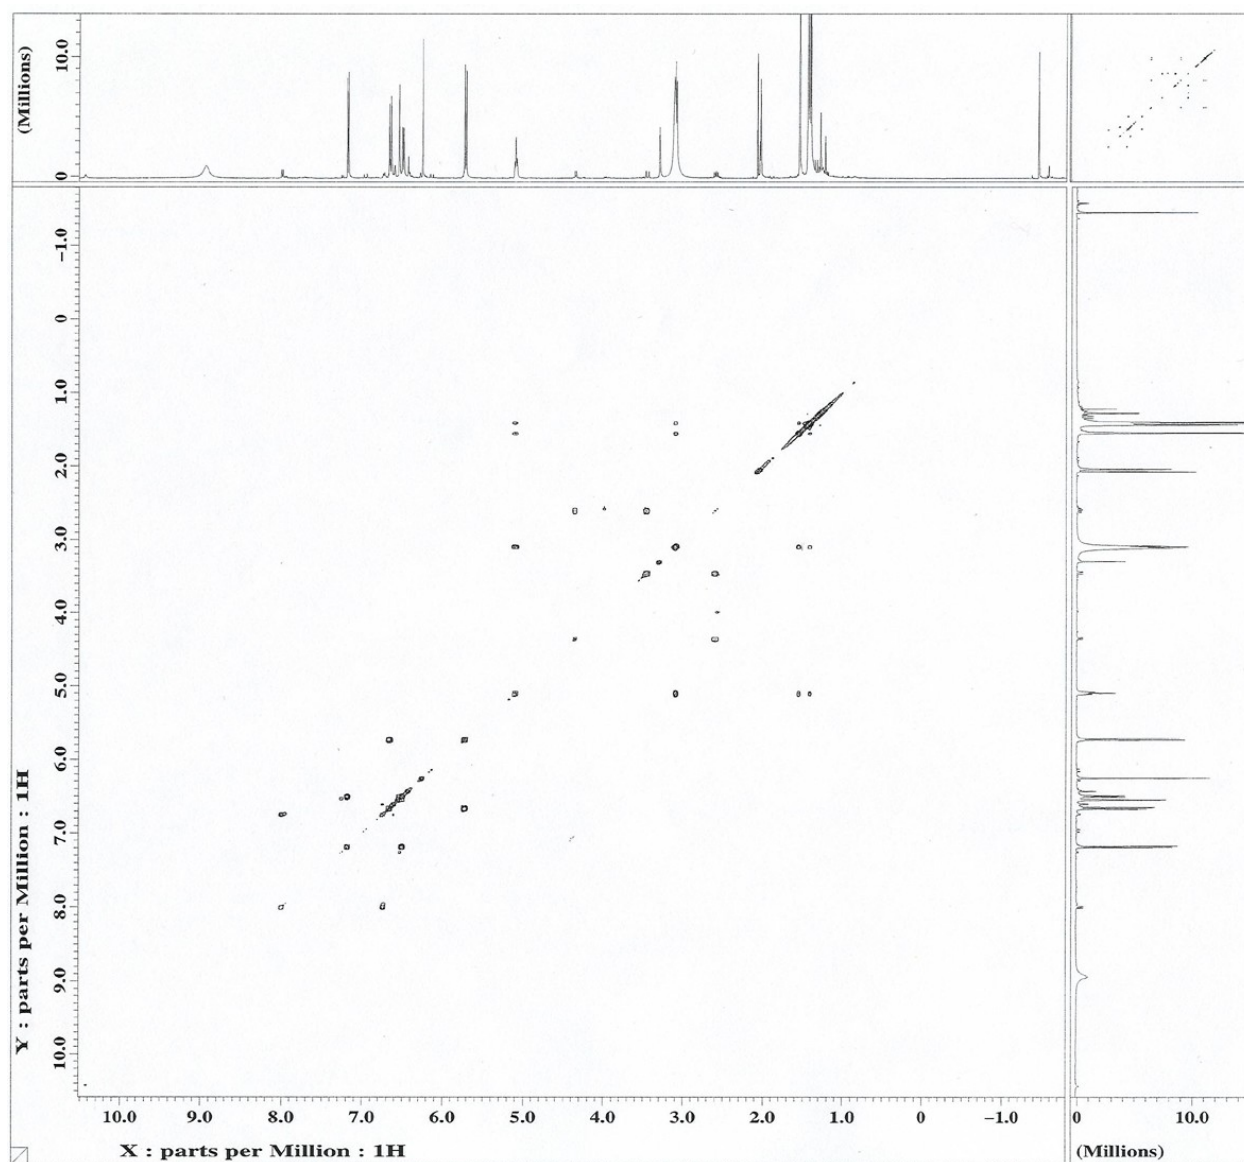

Figure S5. HMBC data of cudarflavone B.

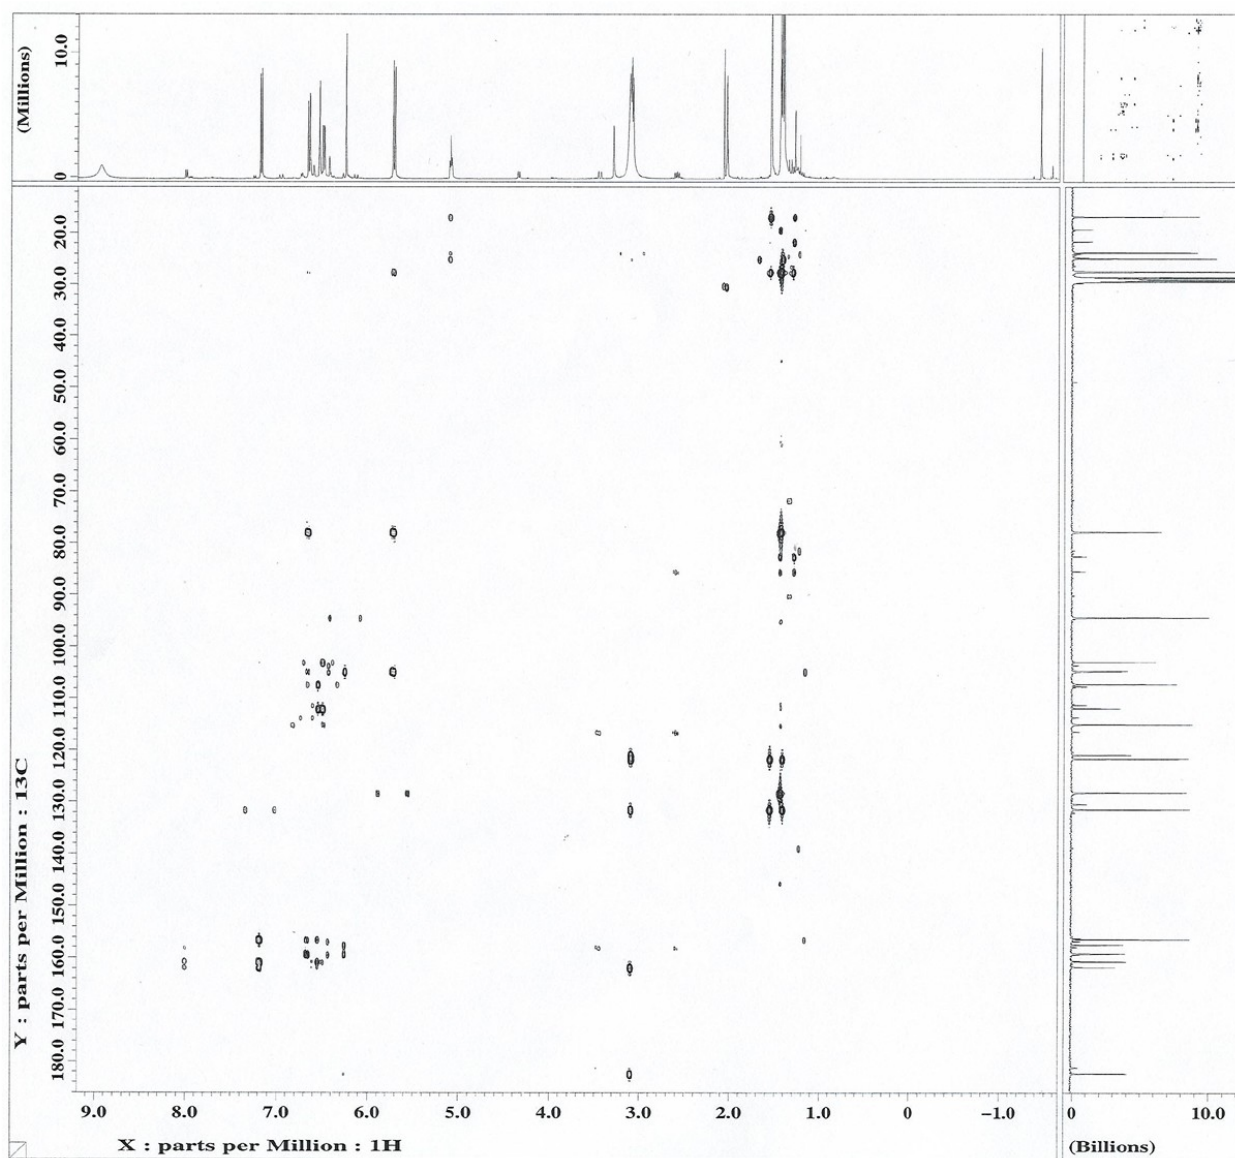

Supplement: molecules-19-10818-s001.pdf [file molecules-19-10818-s001.pdf]
